# Supplementary material
Source: publisher figshare collection journal article supplement (https://acs.figshare.com/ndownloader/files/5159746)
Supplement: Supplementary file 1 [file 5159746]

# Preparation of tertiary amides from carbamoyl chlorides and organocuprates

*Laurent Lemoucheux, Thomas Seitz, Jacques Rouden, and Marie-Claire Lasne*

Laboratoire de Chimie Moléculaire et Thio-organique, CNRS UMR 6507, ENSICAen, Université de  
Caen-Basse Normandie, 6 Boulevard du Maréchal Juin, F14050 Caen Cedex, France

[rouden@ismra.fr](mailto:rouden@ismra.fr)

## Supporting Information

### General experimental details.

Tetrahydrofuran (THF) was dried and distilled from sodium benzophenone ketyl. Ether was distilled from LiAlH<sub>4</sub> and toluene from sodium. CH<sub>2</sub>Cl<sub>2</sub>, Et<sub>3</sub>N and carbamoyl chlorides were distilled from CaH<sub>2</sub> before use. Organolithium and Grignard reagent solutions were purchased and titrated before use.<sup>1</sup> GC analyses were performed on a 5% Phenyl methylpolysiloxane column BPX5 (0.32 mm Internal Diameter, 30 m Length, 1 µm Film thickness), with 10 psi of nitrogen as gas carrier.

For Table 1: Amides **4a-e**, **8a-e**, **12a-e**, formamides **5**, **9**, **13**, ureas **6**, **10**, **14** and oxalamides **7**, **11**, **15** which were not commercially available, were synthesized by conventional methods using amines and acids or their derivatives. All purified compounds were analysed by GC: 120 °C for 2 min, 120 °C to 250 °C with 20 °C per min, 250 °C for 6 min 30 sec. Calibration curves were established for each product for GC quantification.

GC-MS analyses were performed on a CP-Sil 8CB Low BLEED column (L: 30 m, D: 0.25 mm) and Electronic Impact was the method used on the MS detector.

---

<sup>1</sup> For organolithium solutions: Juaristi, E.; Martinez-Richa, A.; Garcia-Rivera, A.; Cruz-Sanchez, J. S. *J. Org. Chem.* **1983**, 48, 2603-2606. For Grignard reagent solutions: Watson, S. C.; Eastham, J. F. *J. Organomet. Chem.* **1967**, 9, 165-168.

**General procedure of reactions using cyano-Gilman lithiocuprates (Table 1).**

Under a nitrogen atmosphere, the organolithium solution (7.2 mmol, 2.4 equiv) was slowly added to a cold ( $-30\text{ }^{\circ}\text{C}$ ) suspension of CuCN (0.32 g, 3.6 mmol, 1.2 equiv) in THF or Et<sub>2</sub>O (30 mL). After 30 min, carbamoyl chloride (3.0 mmol, 1 equiv) was added at  $-30\text{ }^{\circ}\text{C}$ . The reaction was stirred 2 h at cold temperature or rt (see table 1), quenched with a saturated NH<sub>4</sub>Cl solution (2 mL) and dried (MgSO<sub>4</sub>). The volume was completed to 100 mL by addition of CH<sub>2</sub>Cl<sub>2</sub> and a sample was injected to GC (quantification of products). After addition of a 28% NH<sub>4</sub>OH solution (30 mL), stirring was pursued until the color of the solution turned deep blue. The reaction mixture was extracted with CH<sub>2</sub>Cl<sub>2</sub>, the combined organic layers were dried (MgSO<sub>4</sub>) and concentrated to yield crude amides **4**, **8** and **12** which were purified (by flash chromatography or Kugelrohr distillation) when necessary.

**General procedure of reactions using cyano-Gilman magnesiocuprates (Table 2).**

Under a nitrogen atmosphere, the organomagnesium solution (13.66 mmol, 2.1 equiv) was slowly added to a cold ( $-30\text{ }^{\circ}\text{C}$ ) suspension of CuCN (0.61 g, 6.82 mmol, 1.05 equiv) in Et<sub>2</sub>O (60 mL). After 45 min, carbamoyl chloride (6.50 mmol, 1 equiv) was added at  $-30\text{ }^{\circ}\text{C}$ , the reaction mixture was slowly warmed to rt and stirred 15 h. The reaction were quenched with a saturated NH<sub>4</sub>Cl solution (10 mL) and after addition of a 28% NH<sub>4</sub>OH solution (20 mL), stirring was pursued until the color of the solution turned deep blue. The reaction mixture was extracted with CH<sub>2</sub>Cl<sub>2</sub>, the combined organic layers were dried (MgSO<sub>4</sub>) and concentrated to yield crude amides **8** which were purified (by flash chromatography or Kugelrohr distillation) when necessary.

**Table 1.** Qualitative and quantitative results of the reaction between carbamoyl chlorides and cyano-Gilman reagents

| <div>R<sup>3</sup></div> <div>a <i>n</i>-Bu</div> <div>b <i>s</i>-Bu</div> <div>c <i>t</i>-Bu</div> <div>d Ph</div> <div>e Me</div> | <div></div>                   | <div><math>\xrightarrow[\text{THF or Et}_2\text{O}]{(\text{R}^3)_2\text{CuLi} \cdot \text{LiCN}}</math></div> | <div></div>  | <div></div>       | <div></div>            | <div></div>     |                            |                 |                       |                 |                            |                 |    |           |    |   |
|-------------------------------------------------------------------------------------------------------------------------------------|-------------------------------|---------------------------------------------------------------------------------------------------------------|--------------|-------------------|------------------------|-----------------|----------------------------|-----------------|-----------------------|-----------------|----------------------------|-----------------|----|-----------|----|---|
|                                                                                                                                     | <b>1</b> X = NEt <sub>2</sub> |                                                                                                               | <b>4a-e</b>  | <b>5</b>          | <b>6</b>               | <b>7</b>        |                            |                 |                       |                 |                            |                 |    |           |    |   |
|                                                                                                                                     | <b>2</b> X =                  |                                                                                                               | <b>8a-e</b>  | <b>9</b>          | <b>10</b>              | <b>11</b>       |                            |                 |                       |                 |                            |                 |    |           |    |   |
|                                                                                                                                     | <b>3</b> X =                  |                                                                                                               | <b>12a-e</b> | <b>13</b>         | <b>14</b>              | <b>15</b>       |                            |                 |                       |                 |                            |                 |    |           |    |   |
|                                                                                                                                     |                               |                                                                                                               |              |                   |                        |                 |                            |                 |                       |                 |                            |                 |    |           |    |   |
| entry                                                                                                                               | sm <sup>a</sup>               | cuprate <sup>b</sup>                                                                                          | T (°C)       |                   | amide (%) <sup>c</sup> |                 | formamide (%) <sup>c</sup> |                 | urea (%) <sup>c</sup> |                 | oxalamide (%) <sup>c</sup> |                 |    |           |    |   |
|                                                                                                                                     |                               | R <sup>3</sup>                                                                                                | THF          | Et <sub>2</sub> O | THF                    | Et <sub>2</sub> | THF                        | Et <sub>2</sub> | THF                   | Et <sub>2</sub> | THF                        | Et <sub>2</sub> |    |           |    |   |
|                                                                                                                                     |                               |                                                                                                               |              |                   |                        | O               |                            | O               |                       | O               |                            | O               |    |           |    |   |
| 1                                                                                                                                   | <b>1</b>                      | <i>n</i> -Bu                                                                                                  | -30 to 0     | -30 to rt         | <b>4a</b>              | 85              | 70                         | <b>5</b>        | 0                     | 2               | <b>6</b>                   | 5               | 0  | <b>7</b>  | 0  | 0 |
| 2                                                                                                                                   | <b>1</b>                      | <i>s</i> -Bu                                                                                                  | -30 to 0     | -30 to 0          | <b>4b</b>              | 90              | 62                         | <b>5</b>        | 0                     | 11              | <b>6</b>                   | 0               | 0  | <b>7</b>  | 0  | 0 |
| 3                                                                                                                                   | <b>1</b>                      | <i>t</i> -Bu                                                                                                  | -30 to 0     | -30 to 0          | <b>4c</b>              | 37 <sup>f</sup> | 33 <sup>f</sup>            | <b>5</b>        | 0                     | 8               | <b>6</b>                   | 4               | 13 | <b>7</b>  | 0  | 3 |
| 4                                                                                                                                   | <b>1</b>                      | Ph                                                                                                            | -30 to rt    | -30 to rt         | <b>4d</b>              | 50              | 70                         | <b>5</b>        | 0                     | 0               | <b>6</b>                   | 2               | 16 | <b>7</b>  | 0  | 0 |
| 5                                                                                                                                   | <b>1</b>                      | Me                                                                                                            | -30 to rt    | -30 to 0          | <b>4e</b>              | 90              | 80                         | <b>5</b>        | 0                     | 0               | <b>6</b>                   | 0               | 0  | <b>7</b>  | 0  | 0 |
| 6                                                                                                                                   | <b>2</b>                      | <i>n</i> -Bu                                                                                                  | -30          | -30 to 0          | <b>8a</b>              | 83 <sup>e</sup> | 38                         | <b>9</b>        | 0                     | 2               | <b>10</b>                  | 9               | 25 | <b>11</b> | 4  | 0 |
| 7                                                                                                                                   | <b>2</b>                      | <i>s</i> -Bu                                                                                                  | -30 to rt    | -30 to rt         | <b>8b</b>              | 50 <sup>e</sup> | 33 <sup>d</sup>            | <b>9</b>        | 2                     | 8               | <b>10</b>                  | 8               | 4  | <b>11</b> | 14 | 4 |
| 8                                                                                                                                   | <b>2</b>                      | <i>t</i> -Bu                                                                                                  | -30          | -30 to rt         | <b>8c</b>              | 62 <sup>e</sup> | 43 <sup>d</sup>            | <b>9</b>        | 2                     | 5               | <b>10</b>                  | 9               | 6  | <b>11</b> | 1  | 4 |
| 9                                                                                                                                   | <b>2</b>                      | Ph                                                                                                            | -30          | -30 to 0          | <b>8d</b>              | 64              | 70                         | <b>9</b>        | 0                     | 0               | <b>10</b>                  | 4               | 4  | <b>11</b> | 4  | 3 |
| 10                                                                                                                                  | <b>2</b>                      | Me                                                                                                            | -30          | -30 to rt         | <b>8e</b>              | 30              | 20                         | <b>9</b>        | 0                     | 0               | <b>10</b>                  | 2               | 16 | <b>11</b> | 8  | 4 |
| 11                                                                                                                                  | <b>3</b>                      | <i>n</i> -Bu                                                                                                  | -30          | -30 to 0          | <b>12a</b>             | 75              | 70                         | <b>13</b>       | 0                     | 4               | <b>14</b>                  | 6               | 5  | <b>15</b> | 0  | 0 |
| 12                                                                                                                                  | <b>3</b>                      | <i>s</i> -Bu                                                                                                  | -30 to rt    | -30 to rt         | <b>12b</b>             | 75              | 70                         | <b>13</b>       | 0                     | 10              | <b>14</b>                  | 1               | 1  | <b>15</b> | 1  | 0 |
| 13                                                                                                                                  | <b>3</b>                      | <i>t</i> -Bu                                                                                                  | -30 to 0     | -30 to 0          | <b>12c</b>             | 85 <sup>e</sup> | 55 <sup>f</sup>            | <b>13</b>       | 0                     | 1               | <b>14</b>                  | 0               | 1  | <b>15</b> | 0  | 0 |
| 14                                                                                                                                  | <b>3</b>                      | Ph                                                                                                            | -30 to 0     | -30 to 0          | <b>12d</b>             | 84              | 83                         | <b>13</b>       | 0                     | 0               | <b>14</b>                  | 5               | 5  | <b>15</b> | 1  | 0 |
| 15                                                                                                                                  | <b>3</b>                      | Me                                                                                                            | -30          | -30               | <b>12e</b>             | 70              | 68                         | <b>13</b>       | 0                     | 0               | <b>14</b>                  | 1               | 0  | <b>15</b> | 0  | 0 |

<sup>a</sup> Starting material. <sup>b</sup> Cyanocuprate reagents were prepared at -30 °C. Reaction time: 2 h. <sup>c</sup> GC yields.

<sup>d</sup> 5-10% unreacted carbamoyl chloride. <sup>e</sup> 10-20% unreacted carbamoyl chloride. <sup>f</sup> 20-40% unreacted carbamoyl chloride.
